# Supplementary material for: Distinct roles for RSC and SWI/SNF chromatin remodelers in genomic excision repair
Source: PubMed Central journal article supplement — Genome Res. 2021 Jun;31(6):1047–59. doi: 10.1101/gr.274373.120 (PMC8168587; doi:10.1101/gr.274373.120), 2021-06
Supplement: supp_gr.274373.120_Supplemental_Fig_S4.pdf [file supp_gr.274373.120_Supplemental_Fig_S4.pdf]

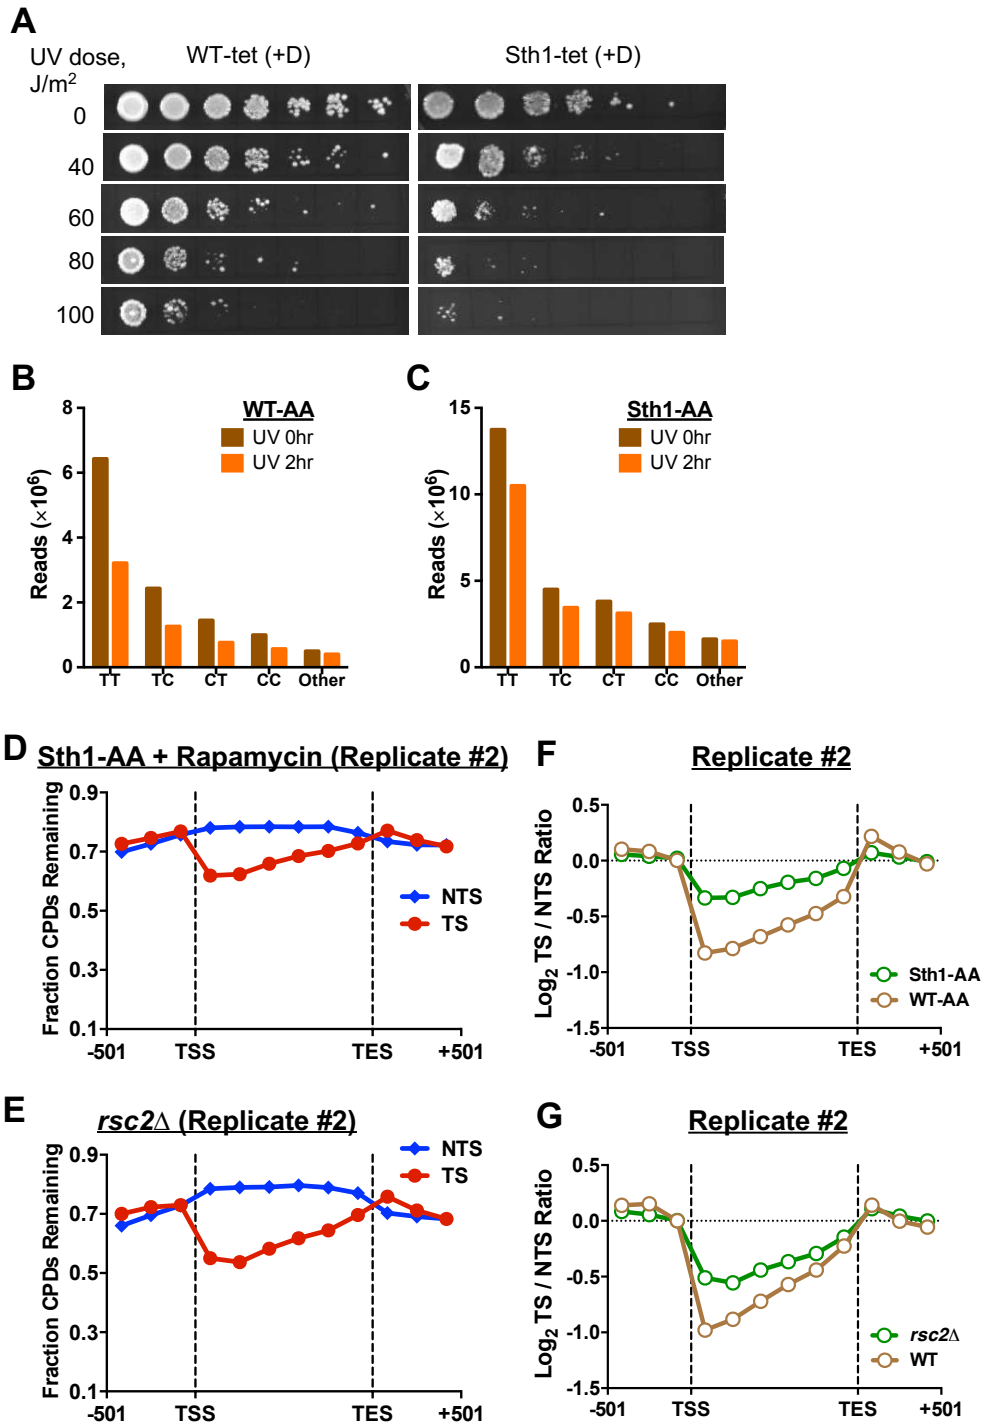

**Supplemental Figure S4:** (A) Sth1 depletion by addition of doxycycline (+D) using Tet-off system causes UV sensitivity in yeast. (B,C) Analysis of dinucleotides associated with CPD-seq reads in WT-AA and Sth1-AA cells. (D-G) Replicates of Sth1-AA and *rsc2Δ* CPD-seq data. Original replicates are shown in Fig. 3G,H and Fig. 4A,B.
