# Supplementary material for: Distinct roles for RSC and SWI/SNF chromatin remodelers in genomic excision repair
Source: PubMed Central journal article supplement — Genome Res. 2021 Jun;31(6):1047–59. doi: 10.1101/gr.274373.120 (PMC8168587; doi:10.1101/gr.274373.120), 2021-06
Supplement: supp_gr.274373.120_Supplemental_Fig_S6.pdf [file supp_gr.274373.120_Supplemental_Fig_S6.pdf]

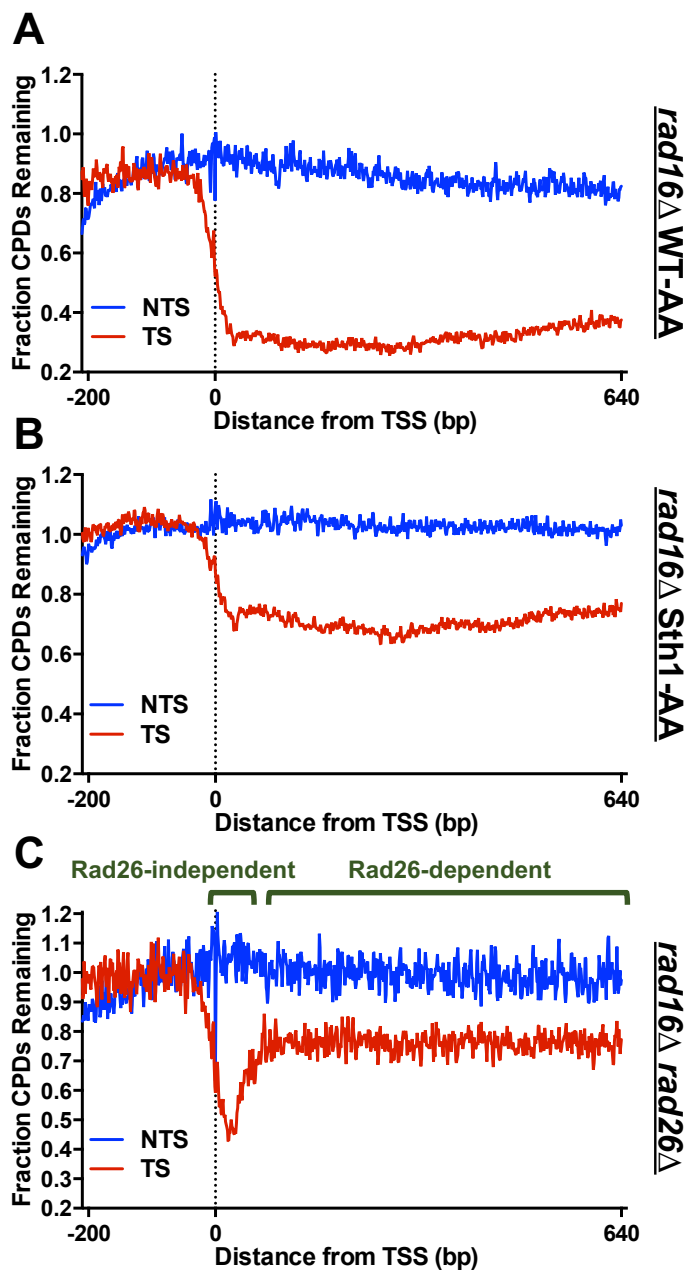

**Supplemental Figure S6:** Sth1-AA depletion effects both Rad26-dependent and Rad26-independent TC-NER. (**A-C**) CPD-seq analysis examining the repair of CPDs on both DNA strands across ~5200 yeast genes relative to the transcription start site (TSS) following 2hr repair in (**A**) *rad16*Δ WT-AA, (**B**) *rad16*Δ Sth1-AA, and (**C**) *rad16*Δ*rad26*Δ. CPD-seq data for *rad16*Δ*rad26*Δ was originally published in (Duan et al. 2020).
