# Supplementary material for: Distinct roles for RSC and SWI/SNF chromatin remodelers in genomic excision repair
Source: PubMed Central journal article supplement — Genome Res. 2021 Jun;31(6):1047–59. doi: 10.1101/gr.274373.120 (PMC8168587; doi:10.1101/gr.274373.120), 2021-06
Supplement: supp_gr.274373.120_Supplemental_Fig_S7.pdf [file supp_gr.274373.120_Supplemental_Fig_S7.pdf]

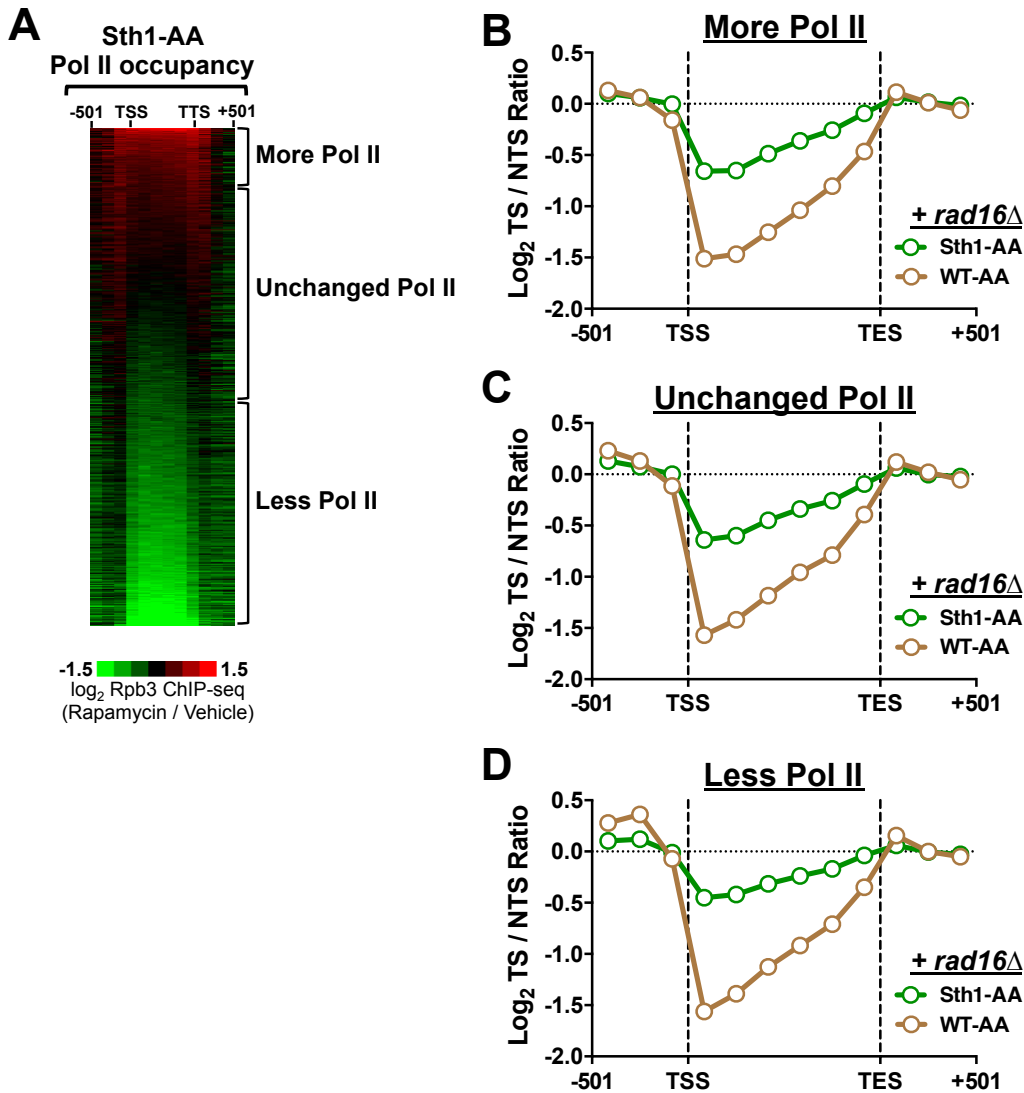

**Supplemental Figure S7:** (A) Gene plot analysis comparing TC-NER defects in gene sets with either increased (B), no change (C), or decreased (D) RNA pol II occupancy in Sth1-AA completed cells. Analysis based on ChIP-seq data mapping Rpb3 occupancy (Kubik et al. 2018). Analysis of TC-NER efficiency of GG-NER deficient *rad16*ΔWT-AA to *rad16*ΔSth1-AA in each of the RNA pol II occupancy subgroups. Values calculated using the log ratio of unrepaired CPDs on the TS relative to the NTS after 2 hours of repair for ~5000 genes.
