# Supplementary material for: Distinct roles for RSC and SWI/SNF chromatin remodelers in genomic excision repair
Source: PubMed Central journal article supplement — Genome Res. 2021 Jun;31(6):1047–59. doi: 10.1101/gr.274373.120 (PMC8168587; doi:10.1101/gr.274373.120), 2021-06
Supplement: supp_gr.274373.120_Supplemental_Fig_S11.pdf [file supp_gr.274373.120_Supplemental_Fig_S11.pdf]

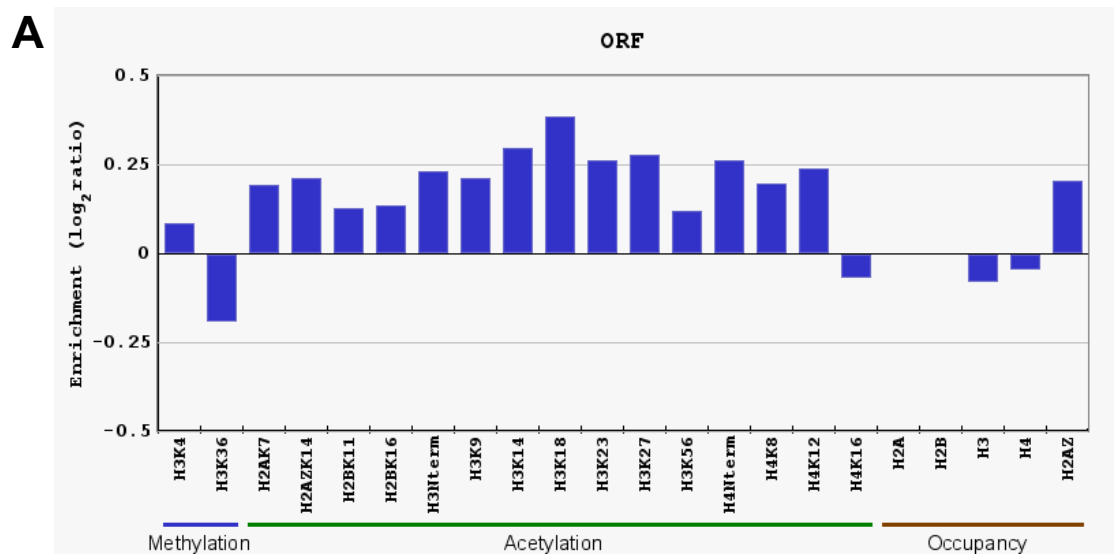

**B**

**Chromatin Enrichment/Depletion**  
Open Reading Frame

| Histone Modification | Rank Percentile | Trend*          | P-value*     | Ranked Gene List |
|----------------------|-----------------|-----------------|--------------|------------------|
| H3K4 Di-Methylation  | 54.4 %          | none            | 0.0598       | ■                |
| H3K36 Di-Methylation | 36.3 %          | <b>Depleted</b> | $< 10^{-8}$  | ■                |
| H2AK7 Acetylation    | 63.0 %          | none            | 0.0010       | ■                |
| H2AZK14 Acetylation  | 63.0 %          | <b>Enriched</b> | $< 10^{-6}$  | ■                |
| H2BK11 Acetylation   | 57.7 %          | none            | 0.0536       | ■                |
| H2BK16 Acetylation   | 58.4 %          | none            | 0.0346       | ■                |
| H3Nterm Acetylation  | 65.0 %          | <b>Enriched</b> | $< 10^{-9}$  | ■                |
| H3K9 Acetylation     | 64.0 %          | <b>Enriched</b> | $< 10^{-3}$  | ■                |
| H3K14 Acetylation    | 69.0 %          | <b>Enriched</b> | $< 10^{-5}$  | ■                |
| H3K18 Acetylation    | 70.8 %          | <b>Enriched</b> | $< 10^{-6}$  | ■                |
| H3K23 Acetylation    | 66.6 %          | <b>Enriched</b> | $< 10^{-4}$  | ■                |
| H3K27 Acetylation    | 67.0 %          | <b>Enriched</b> | $< 10^{-4}$  | ■                |
| H3K56 Acetylation    | 59.4 %          | <b>Enriched</b> | $< 10^{-3}$  | ■                |
| H4Nterm Acetylation  | 66.9 %          | <b>Enriched</b> | $< 10^{-12}$ | ■                |
| H4K8 Acetylation     | 61.0 %          | none            | 0.0058       | ■                |
| H4K12 Acetylation    | 64.4 %          | <b>Enriched</b> | $< 10^{-3}$  | ■                |
| H4K16 Acetylation    | 45.8 %          | none            | 0.2908       | ■                |
| H2A Occupancy        | -- %            | --              | --           | ■                |
| H2B Occupancy        | -- %            | --              | --           | ■                |
| H3 Occupancy         | 37.5 %          | <b>Depleted</b> | $< 10^{-7}$  | ■                |
| H4 Occupancy         | 42.3 %          | none            | $< 10^{-3}$  | ■                |
| H2AZ Occupancy       | 59.0 %          | <b>Enriched</b> | $< 10^{-3}$  | ■                |

\*At least 5 genes (with data) are needed to calculate p-values for enrichment or depletion

**Supplemental Figure S11: (A,B)** Chromatin modifications associated with the open reading frame (ORF) of genes with slower repair on the non-transcribed strand in the *snf5Δ* and/or *snf6Δ* mutants relative to WT. Enrichment of histone modifications is derived from published chromatin IP-microarray data (ChIP-chip) and analyzed using the ChromatinDB database (O'Connor and Wyrick 2007).
