# Supplementary material for: Distinct roles for RSC and SWI/SNF chromatin remodelers in genomic excision repair
Source: PubMed Central journal article supplement — Genome Res. 2021 Jun;31(6):1047–59. doi: 10.1101/gr.274373.120 (PMC8168587; doi:10.1101/gr.274373.120), 2021-06
Supplement: supp_gr.274373.120_Supplemental_Fig_S12.pdf [file supp_gr.274373.120_Supplemental_Fig_S12.pdf]

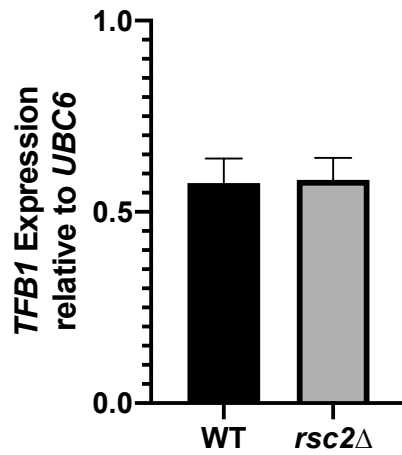

**Supplemental Figure S12:** RT-qPCR data confirms that the yeast *TFB1* gene, which encodes the yeast homolog of the p62 TFIID subunit, is not altered in expression in the *rsc2Δ* mutant. The *UBC6* gene was used as a normalization control.
