# Supplementary material for: Distinct roles for RSC and SWI/SNF chromatin remodelers in genomic excision repair
Source: PubMed Central journal article supplement — Genome Res. 2021 Jun;31(6):1047–59. doi: 10.1101/gr.274373.120 (PMC8168587; doi:10.1101/gr.274373.120), 2021-06
Supplement: supp_gr.274373.120_Supplemental_Fig_S13.pdf [file supp_gr.274373.120_Supplemental_Fig_S13.pdf]

### Role in Nucleosomal DNA

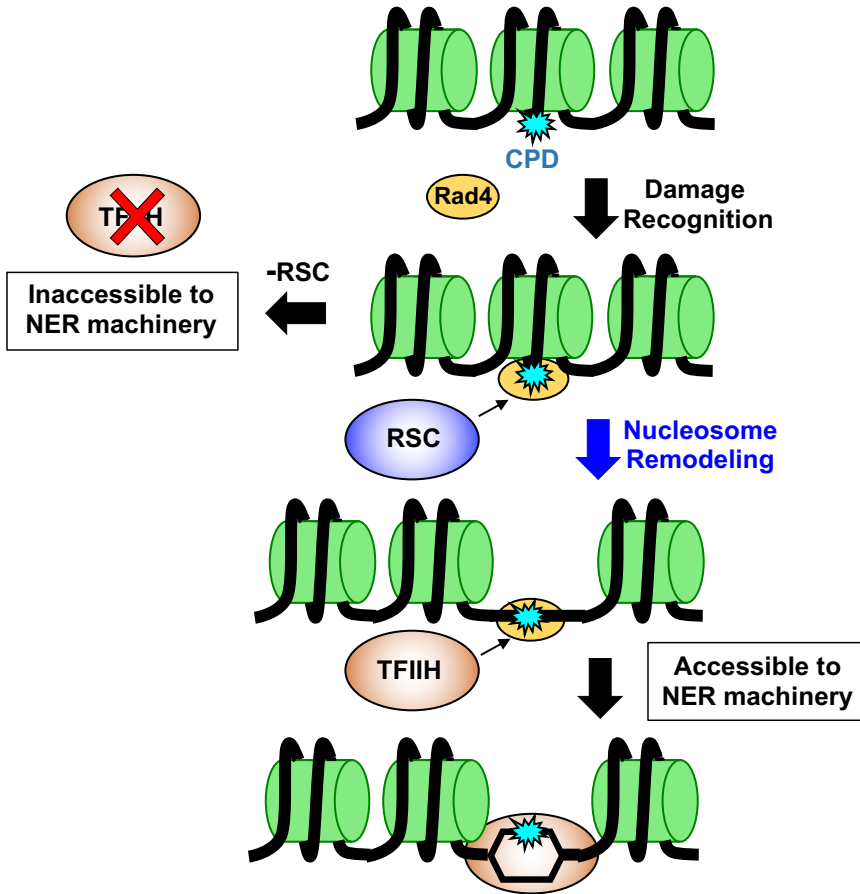

**Supplemental Figure S13:** Model of how RSC may facilitate repair of CPD lesions in nucleosomes by shifting or evicting the associated nucleosome to promote TFIIH recruitment. See also Fig. 7.
