# Supplementary material for: Distinct roles for RSC and SWI/SNF chromatin remodelers in genomic excision repair
Source: PubMed Central journal article supplement — Genome Res. 2021 Jun;31(6):1047–59. doi: 10.1101/gr.274373.120 (PMC8168587; doi:10.1101/gr.274373.120), 2021-06
Supplement: supp_gr.274373.120_Supplemental_Table_S1.pdf [file supp_gr.274373.120_Supplemental_Table_S1.pdf]

**Supplemental Table S1:** Names and genotypes of yeast strains used in this study.

| Strain   | Genotype                                                                                                       | Source               |
|----------|----------------------------------------------------------------------------------------------------------------|----------------------|
| BY4741   | <i>MATa his3Δ1 leu2Δ0 met15Δ0 ura3Δ0</i>                                                                       |                      |
| KB004    | <i>MATa his3Δ1 leu2Δ0 met15Δ0 ura3Δ0 trp1Δ::HIS3 rsc2Δ::TRP1</i>                                               | This study           |
| KB005    | <i>MATa his3Δ1 leu2Δ0 met15Δ0 ura3Δ0 trp1Δ::HIS3 rsc1Δ::TRP1</i>                                               | This study           |
| KB010    | <i>MATa his3Δ1 leu2Δ0 met15Δ0 ura3Δ0 snf5Δ::KanMX</i>                                                          | This study           |
| KB013    | <i>MATa his3Δ1 leu2Δ0 met15Δ0 ura3Δ0 snf6Δ::KanMX</i>                                                          | This study           |
| FH001    | <i>MATa leu2Δ0 met15 ura3Δ0 his3Δ1 tor1-1 fpr1del RPL13A-FKBP12-NAT lys2</i>                                   | Frank<br>Holstege    |
| YAH049   | <i>MATa leu2Δ0 met15 ura3Δ0 his3Δ1 tor1-1 fpr1del Sth1-FRB-eGFP::HygMX RPL13A-FKBP12-NAT lys2</i>              | This study           |
| KB011    | <i>MATa mag1Δ::LEU2 leu2Δ0 met15 ura3Δ0 his3Δ1 tor1-1 fpr1del RPL13A-FKBP12-NAT lys2</i>                       | This study           |
| KB012    | <i>MATa mag1Δ::LEU2 leu2Δ0 met15 ura3Δ0 his3Δ1 tor1-1 fpr1del Sth1-FRB-eGFP::HygMX RPL13A-FKBP12-NAT lys2</i>  | This study           |
| KB014    | <i>MATa rad16Δ::LEU2 leu2Δ0 met15 ura3Δ0 his3Δ1 tor1-1 fpr1del RPL13A-FKBP12-NAT lys2</i>                      | This study           |
| KB015    | <i>MATa rad16Δ::LEU2 leu2Δ0 met15 ura3Δ0 his3Δ1 tor1-1 fpr1del Sth1-FRB-eGFP::HygMX RPL13A-FKBP12-NAT lys2</i> | This study           |
| YAW001   | <i>MATa his3Δ1 leu2Δ0 met15Δ0 ura3Δ0 trp1Δ::HIS3 rsc2Δ::LEU2 rad16Δ::TRP1</i>                                  | This study           |
| YAW002   | <i>MATa his3Δ1 1 leu2Δ0 met15Δ0 ura3Δ0 trp1Δ::HIS3 rsc2Δ::LEU2 rad26Δ::TRP1</i>                                | This study           |
| Tet-STH1 | pSTH1::kanR-tet07-TATA URA3::CMV-tTA <i>MATa his3-1 leu2-0 met15-0</i>                                         | Czaja et al.<br>2014 |
