# Supplementary material for: Distinct roles for RSC and SWI/SNF chromatin remodelers in genomic excision repair
Source: HighWire-hosted journal article supplement (doi:10.1101/gr.274373.120), 2021-05-17
Supplement: Supplemental_Fig_S1.pdf [file Supplemental_Fig_S1.pdf]

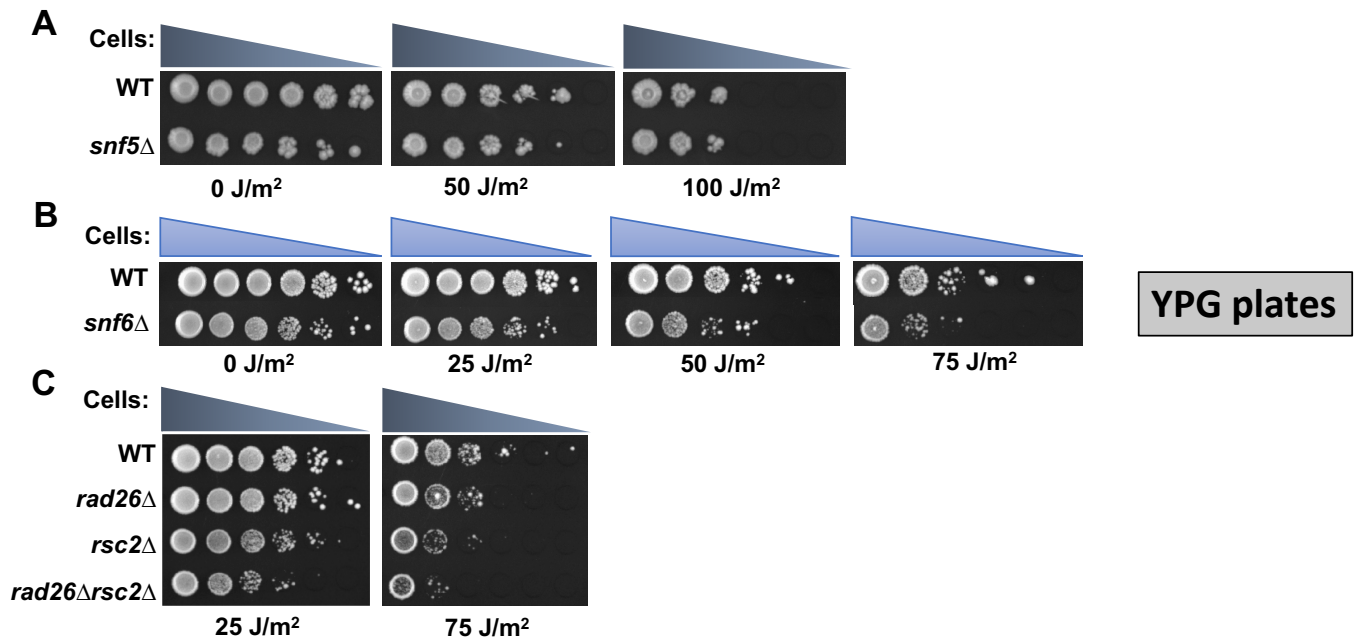

**Supplemental Figure S1:** (A) UV sensitivity of WT (BY4741) and *snf5*Δ mutant. Cells were grown in YPD, diluted, spotted on YPD plates, and exposed to the indicated UVC doses. Images taken 3-5 days post-UV exposure. (B) UV sensitivity of WT and *snf6*Δ mutant grown in YPG (yeast extract peptone galactose). Cells were grown in YPG, diluted, spotted on YPG plates, and exposed to the indicated UVC doses. Images taken 3-5 days post-UV exposure. (C) Additional UV doses showing increased sensitivity of *rad26*Δ*rsc2*Δ double mutant relative to single mutants. Related to Fig. 1C.
