# Supplementary material for: Distinct roles for RSC and SWI/SNF chromatin remodelers in genomic excision repair
Source: HighWire-hosted journal article supplement (doi:10.1101/gr.274373.120), 2021-05-17
Supplement: Supplemental_Fig_S2.pdf [file Supplemental_Fig_S2.pdf]

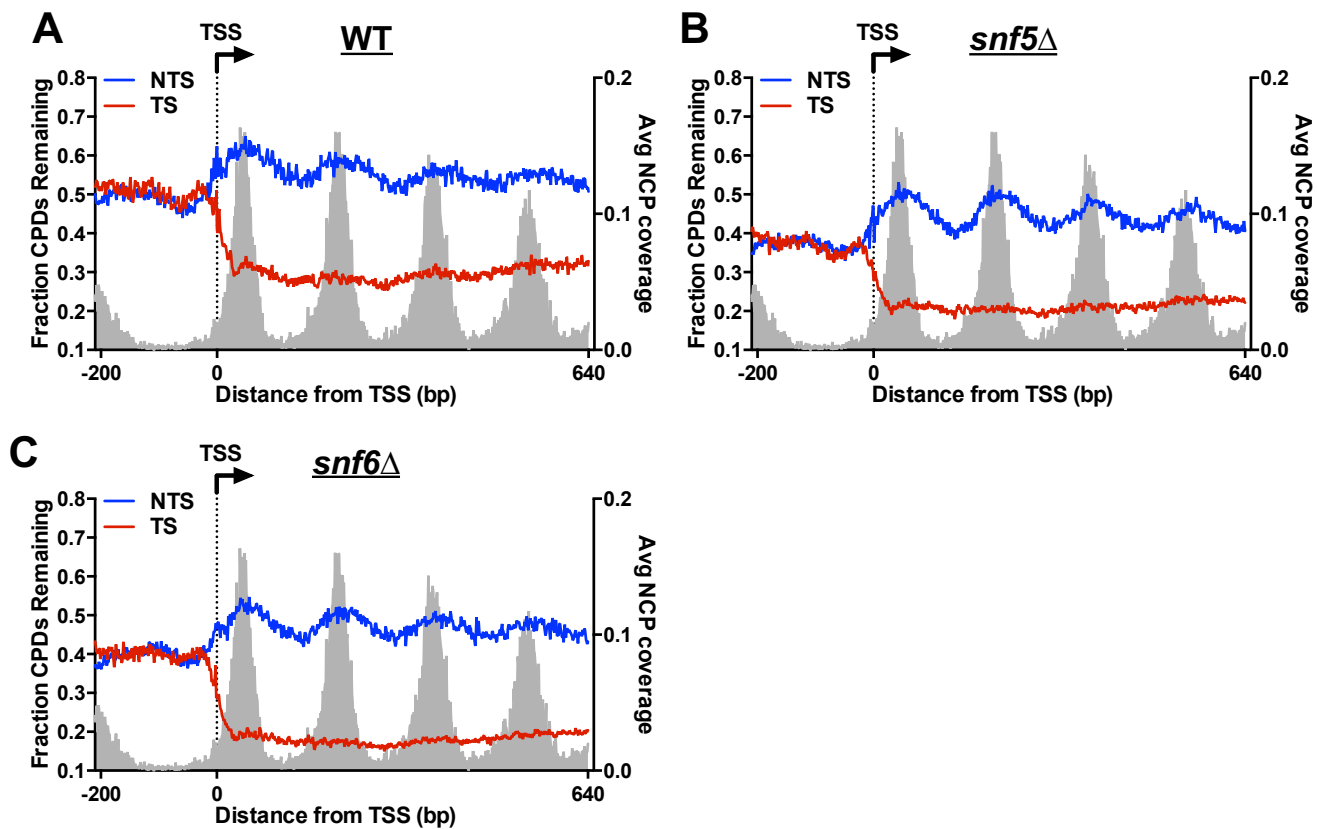

**Supplemental Figure S2: (A-C)** Analysis of the fraction of CPDs remaining following 2hr repair adjacent to the transcription start site (TSS) from CPD-seq data for WT, *snf5* $\Delta$ , and *snf6* $\Delta$  cells. Average NCP coverage indicates the read coverage for nucleosome dyads identified in a previous study (Weiner et al. 2015).
