# Supplementary material for: Distinct roles for RSC and SWI/SNF chromatin remodelers in genomic excision repair
Source: HighWire-hosted journal article supplement (doi:10.1101/gr.274373.120), 2021-05-17
Supplement: Supplemental_Fig_S5.pdf [file Supplemental_Fig_S5.pdf]

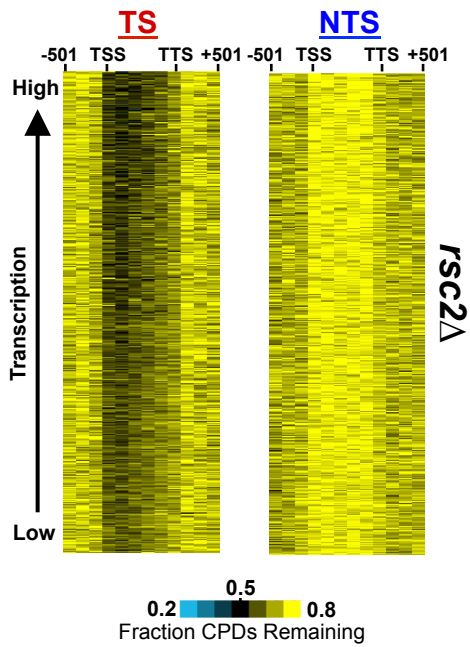

**Supplemental Figure S5:** Gene plot analysis of CPD lesions remaining on the TS and NTS of ~5000 yeast genes in *rsc2Δ* mutants after 2 hours of repair. Similar to Sth1-AA (Figure 3J), there is a significant defect repair on both the TS and NTS for nearly all yeast genes.
