# Supplementary material for: Distinct roles for RSC and SWI/SNF chromatin remodelers in genomic excision repair
Source: HighWire-hosted journal article supplement (doi:10.1101/gr.274373.120), 2021-05-17
Supplement: Supplemental_Fig_S8.pdf [file Supplemental_Fig_S8.pdf]

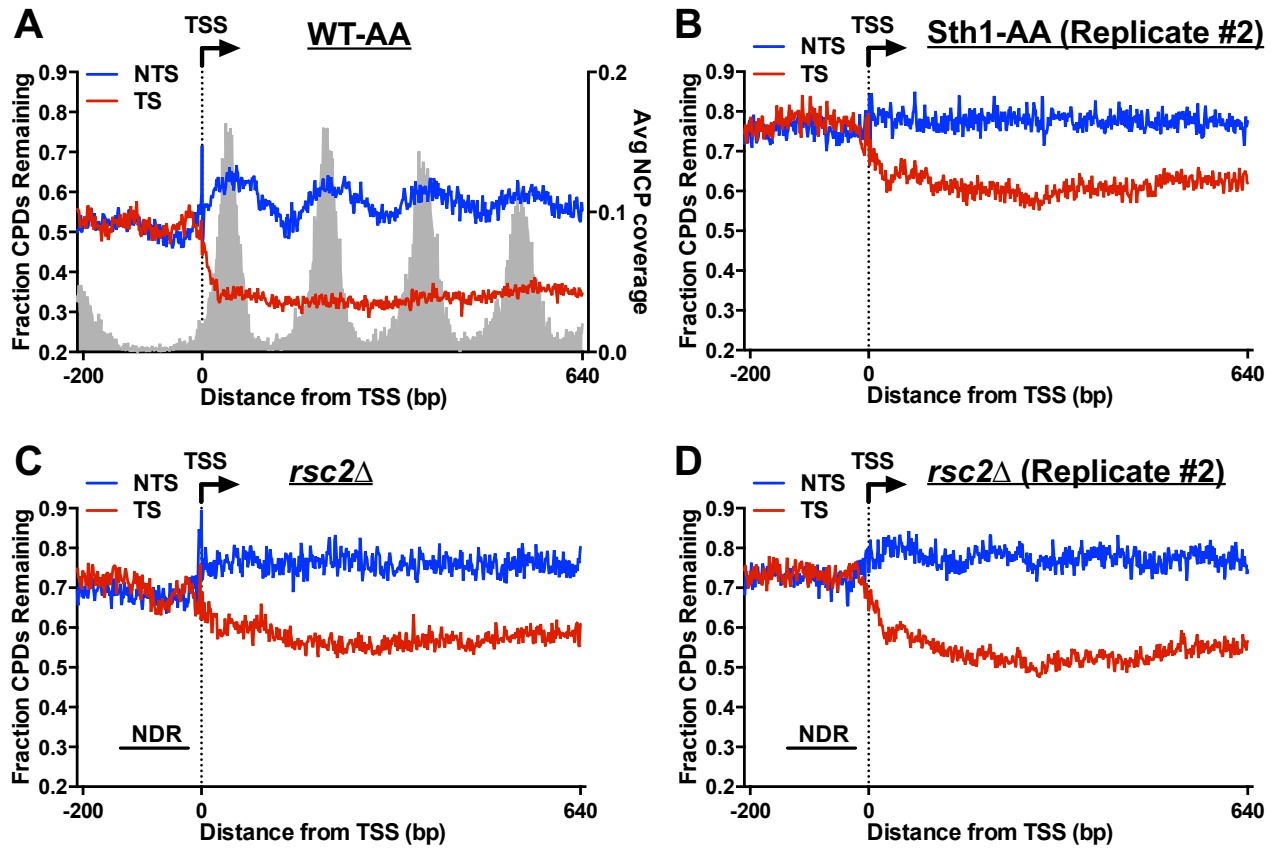

**Supplemental Figure S8:** (A) Data from Figure 5A plotted against average coverage of NCP dyad positions (Weiner et al. 2015). (B-D) CPD-seq analysis examining the repair of CPDs on both DNA strands relative to the transcription start site (TSS) across ~5200 yeast genes following 2hr repair in (B) Sth1-AA (second replicate), (C) *rsc2* $\Delta$ , and (D) *rsc2* $\Delta$  (second replicate).
