# Supplementary material for: Distinct roles for RSC and SWI/SNF chromatin remodelers in genomic excision repair
Source: HighWire-hosted journal article supplement (doi:10.1101/gr.274373.120), 2021-05-17
Supplement: Supplemental_Fig_S9.pdf [file Supplemental_Fig_S9.pdf]

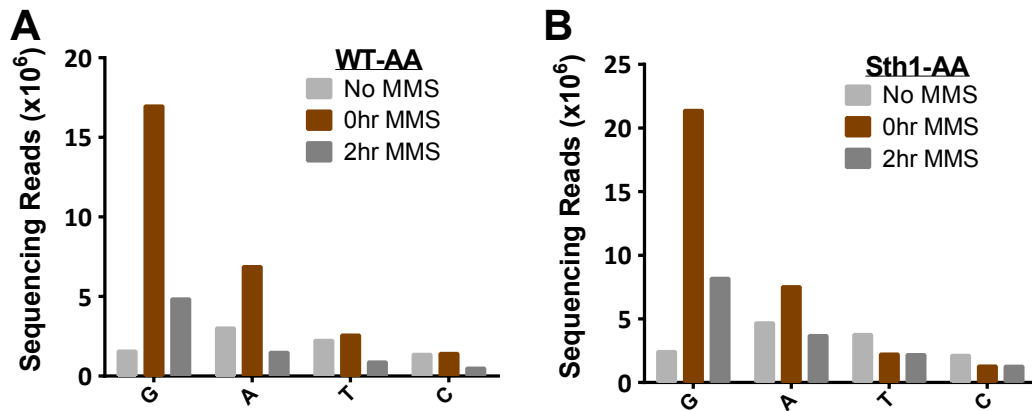

**Supplemental Figure S9: (A,B)** Enrichment of NMP-seq reads associated with putative alkylation lesions at G (7meG) or A (3meA) nucleotides in MMS-treated WT-AA or Sth1-AA cells (0.4% MMS), but not the 'No MMS' control.
