# Supplementary material for: Distinct roles for RSC and SWI/SNF chromatin remodelers in genomic excision repair
Source: HighWire-hosted journal article supplement (doi:10.1101/gr.274373.120), 2021-05-17
Supplement: Supplemental_Fig_S10.pdf [file Supplemental_Fig_S10.pdf]

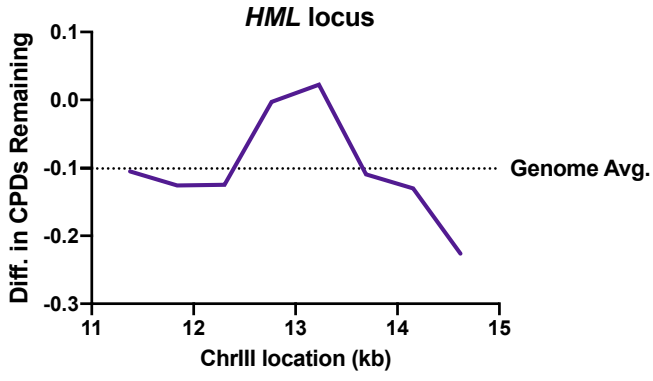

**Supplemental Figure S10:** Difference in fraction of CPDs remaining in the *snf6Δ* mutant relative to WT at the yeast silent *HML* locus, compared to the genome average (dotted line).
